# Supplementary material for: RALBP1 in Oxidative Stress and Mitochondrial Dysfunction in Alzheimer’s Disease
Source: MDPI journal article supplement (doi:10.3390/cells10113113), 2021-11-10
Supplement: s1 [file s1]

## Supplementary Materials

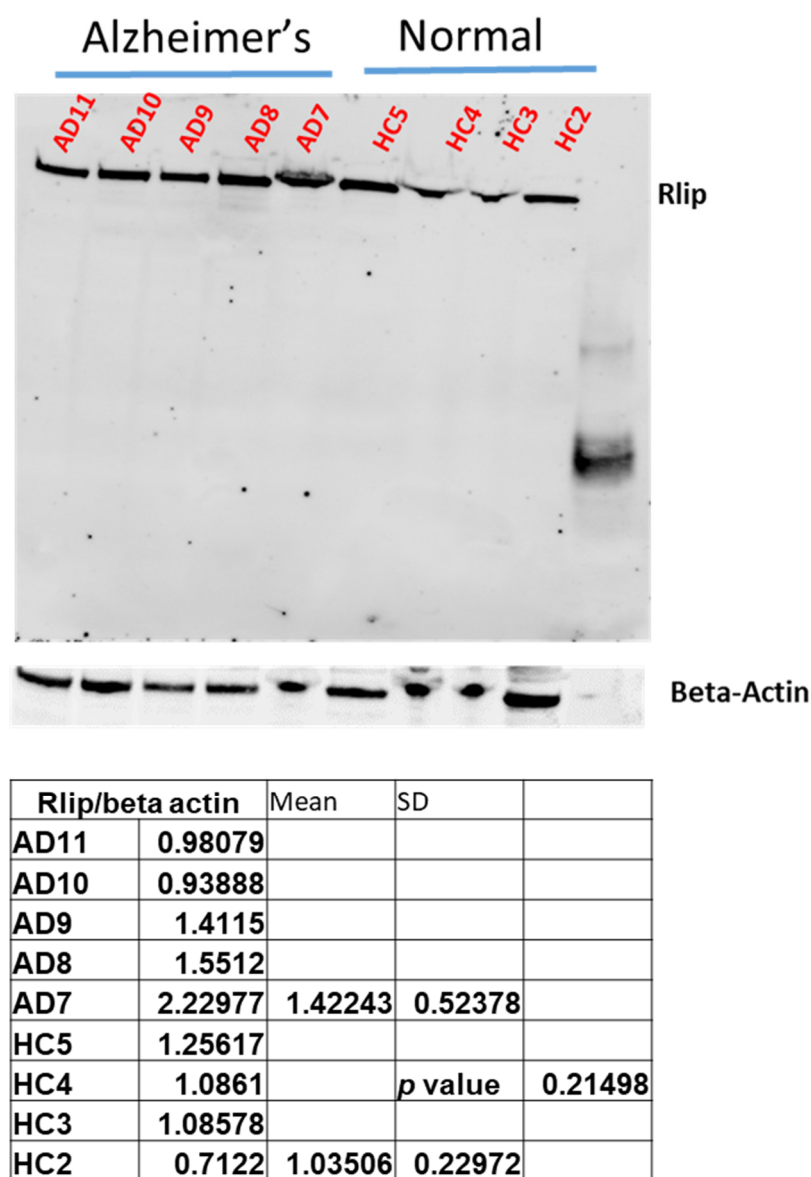

**Figure S1.** Rlip protein expression is not elevated in the prefrontal cortex of early-stage Alzheimer's disease (AD) patients. Rlip protein was measured in prefrontal cortex from 5 early-stage AD and 4 normal brains. Rlip signal was normalized to that of beta-actin. Densitometry for each lane is shown in the table. There was no significant difference in the expression level by Student's *t*-test. SD: Standard Deviation

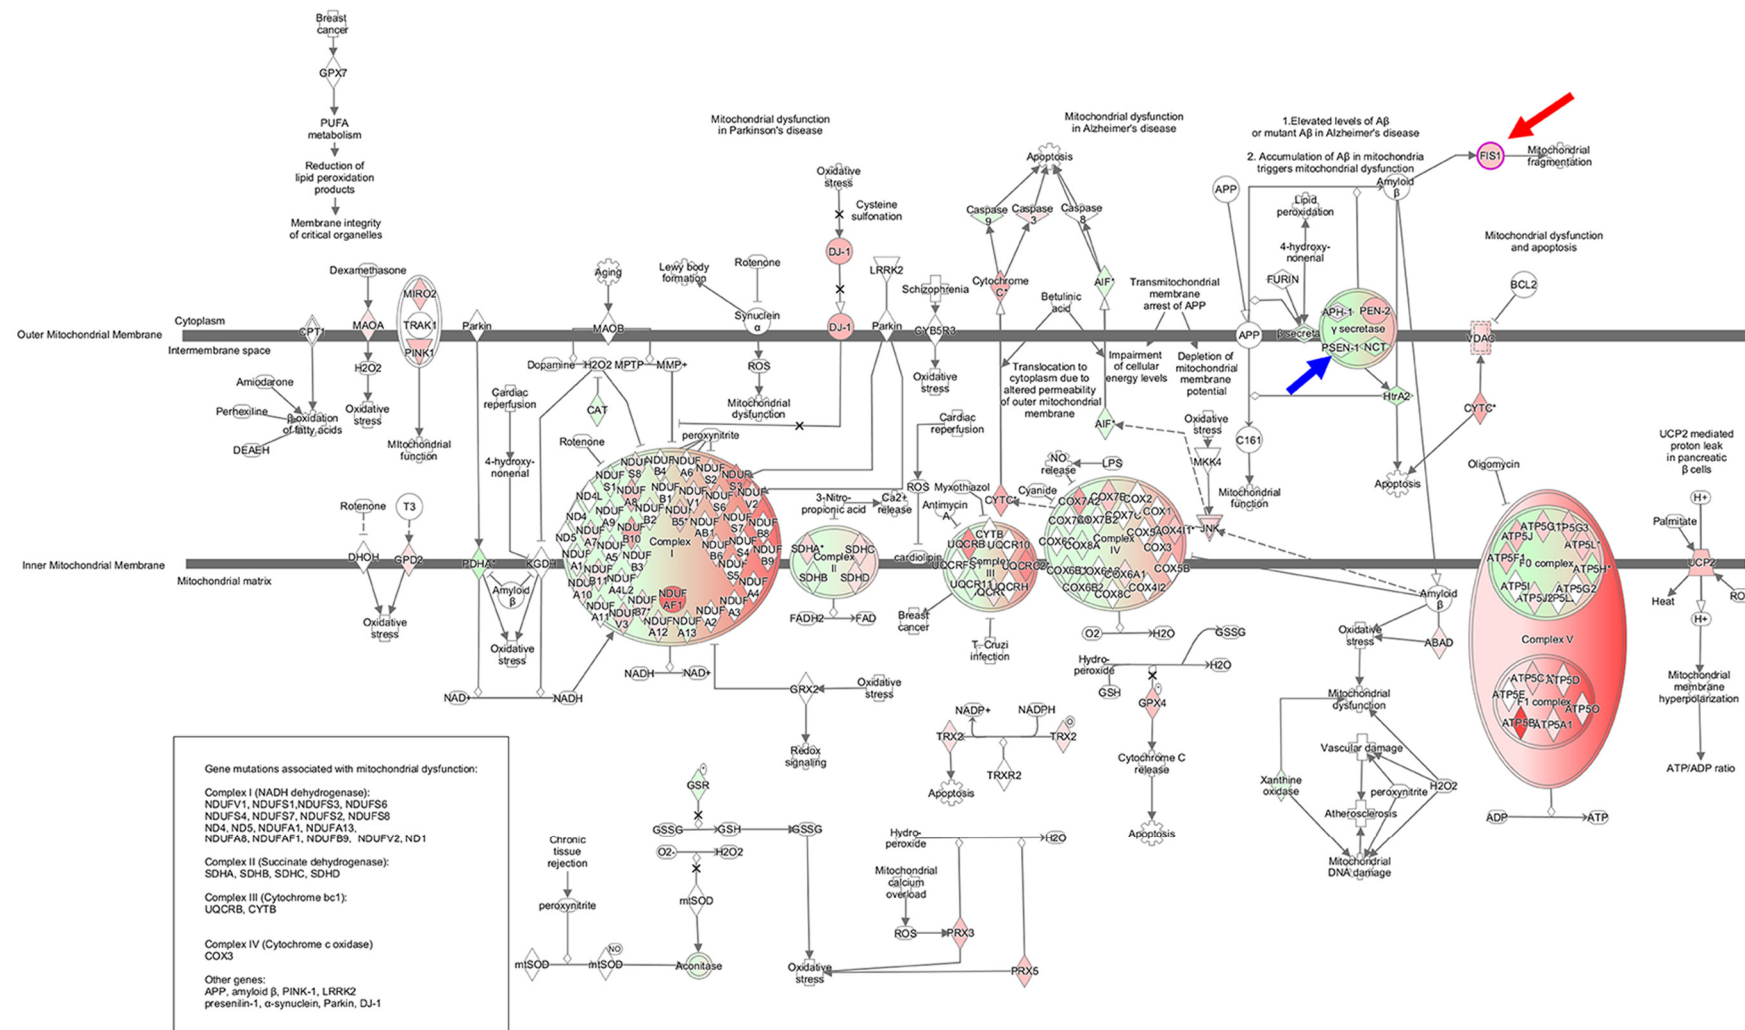

**Figure S2.** Transcriptional effect of Rlip deficiency on mitochondria. Brain RNA-Seq data from Rlip<sup>+/-</sup> mice (average of 5 males, 5 females, with technical replicates) was overlaid on the canonical mitochondrial dysfunction pathway generated in Ingenuity Pathway Analysis. Red shaded nodes indicate increases and green shaded nodes indicate decreased expression in Rlip<sup>+/-</sup> mice, relative to wildtype. Overall, the figure shows that many mitochondrial function genes were aberrantly expressed in the brains of Rlip<sup>+/-</sup> mice. The arrows point out Fis1 (red), and presenilin-1 (PSEN1; blue).

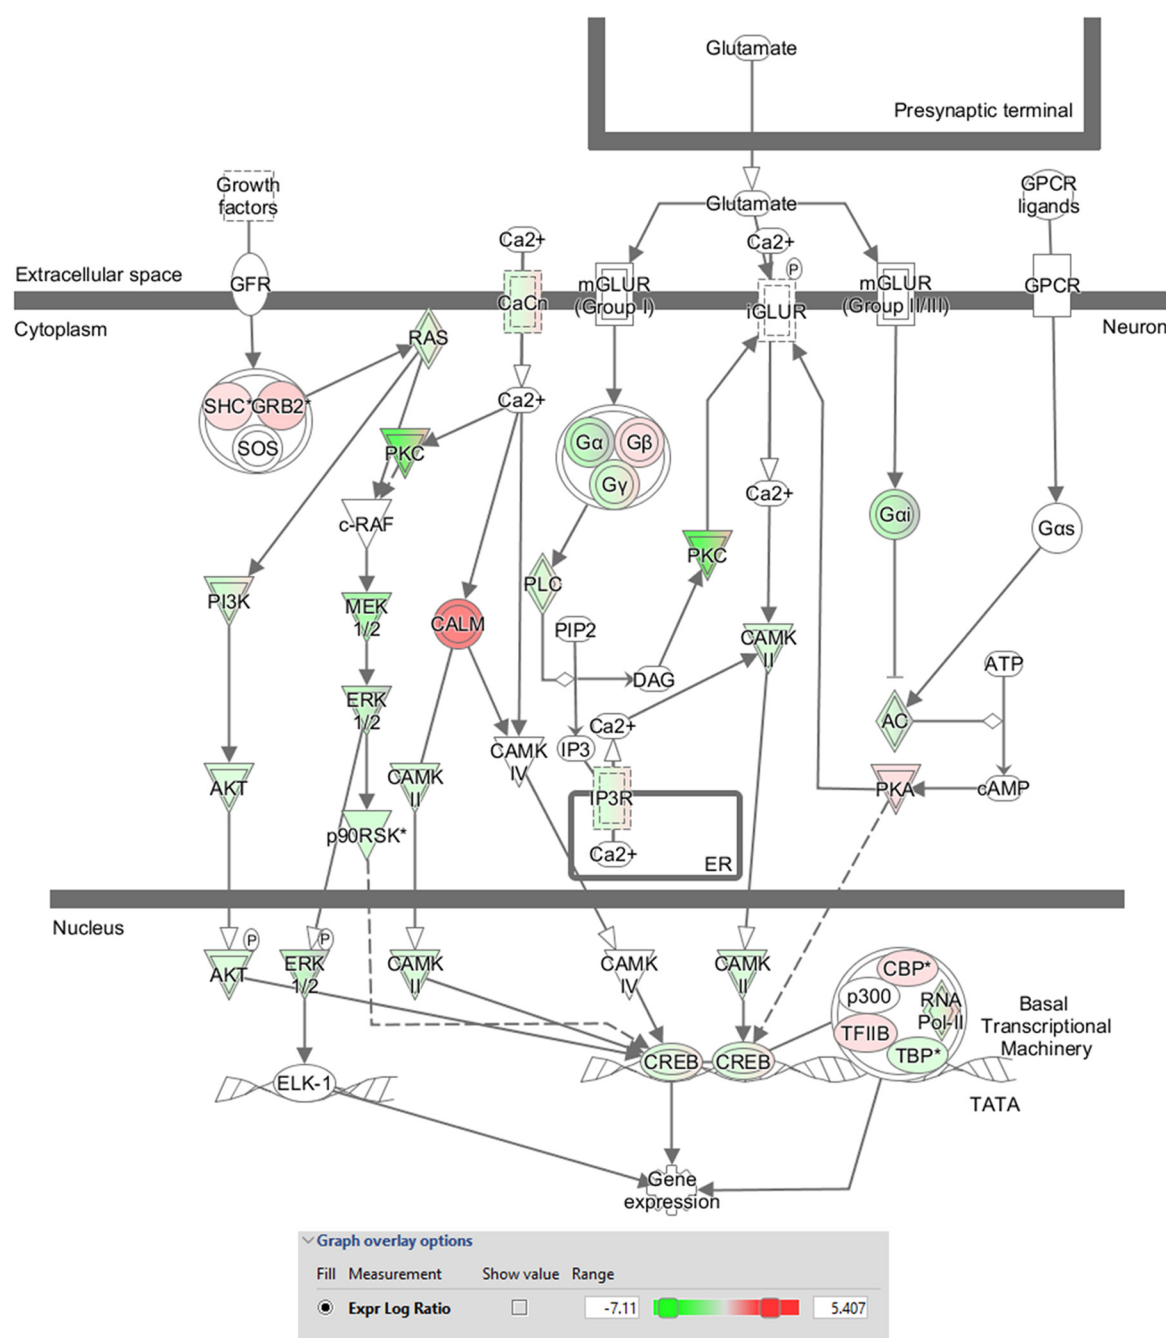

**Figure S3.** Transcriptomic effect of Rlip deficiency. Brain RNA-Seq data from Rlip<sup>+/-</sup> mice (average of 5 males, 5 females, with technical replicates) was overlaid on the canonical neuronal CREB signaling pathway generated in Ingenuity Pathway Analysis. Red shaded nodes indicate increases and green shaded nodes indicate decreased expression in Rlip<sup>+/-</sup> mice, relative to wildtype.
